# Supplementary material for: Faecalibacterium prausnitzii in Differentiated Thyroid Cancer Patients Treated with Radioiodine
Source: MDPI journal article supplement (doi:10.3390/nu15122680), 2023-06-08
Supplement: s1 [file s1]

## Supplementary materials

**Table S1 - Relative abundance Phylum-level before/after RAIT and volunteers**

|                        | Mean $\pm$ SD      |                    |                    |
|------------------------|--------------------|--------------------|--------------------|
| Phylum                 | Before RAIT        | After RAIT         | Volunteers         |
| <b>Firmicutes</b>      | 46.25 $\pm$ 17.64% | 43.29 $\pm$ 17.81% | 50.78 $\pm$ 14.88% |
| <b>Bacteroidetes</b>   | 39.26 $\pm$ 21.06% | 42.31 $\pm$ 19.72% | 33.31 $\pm$ 11.78% |
| <b>Actinobacteria</b>  | 8.66 $\pm$ 13.27%  | 4.93 $\pm$ 5.85%   | 6.20 $\pm$ 5.38%   |
| <b>Proteobacteria</b>  | 5.22 $\pm$ 8.25%   | 5.92 $\pm$ 10.05%  | 8.62 $\pm$ 12.31%  |
| <b>Verrucomicrobia</b> | 2.54 $\pm$ 6.77%   | 3.15 $\pm$ 7.21%   | 0.98 $\pm$ 1.99%   |

**Table S2 - Genus level- relative abundance before/after RAIT**

|                            |        | Mean   | SD     |
|----------------------------|--------|--------|--------|
| <i>Akkermansia</i>         | before | 1.72%  | 4.31%  |
|                            | after  | 3.15%  | 7.21%  |
| <i>Alistipes</i>           | before | 10.03% | 6.40%  |
|                            | after  | 10.90% | 7.02%  |
| <i>Bacteroides</i>         | before | 13.25% | 12.94% |
|                            | after  | 13.84% | 9.93%  |
| <i>Phocaeicola</i>         | before | 5.11%  | 4.27%  |
|                            | after  | 6.48%  | 5.86%  |
| <i>Bifidobacterium</i>     | before | 4.27%  | 6.46%  |
|                            | after  | 2.79%  | 4.04%  |
| <i>Blautia</i>             | before | 1.37%  | 1.45%  |
|                            | after  | 0.93%  | 1.05%  |
| <i>Lachnospiraceae_u_g</i> | before | 3.34%  | 3.49%  |
|                            | after  | 3.15%  | 2.53%  |
| <i>Firmicutes_u_g</i>      | before | 4.23%  | 5.22%  |
|                            | after  | 3.39%  | 3.98%  |
| <i>Clostridium</i>         | before | 1.73%  | 1.58%  |
|                            | after  | 1.74%  | 2.38%  |
| <i>Ruminococcaceae_u_g</i> | before | 3.38%  | 2.68%  |
|                            | after  | 3.67%  | 3.46%  |
| <i>Dialister</i>           | before | 1.08%  | 2.22%  |
|                            | after  | 1.67%  | 4.37%  |
| <i>Dorea</i>               | before | 1.30%  | 2.17%  |
|                            | after  | 0.94%  | 1.96%  |
| <i>Escherichia</i>         | before | 2.06%  | 3.97%  |

|                         |        |       |       |
|-------------------------|--------|-------|-------|
|                         | after  | 3.67% | 9.62% |
| <i>Faecalibacterium</i> | before | 2.78% | 3.04% |
|                         | after  | 3.02% | 3.19% |
| <i>Gemmiger</i>         | before | 2.66% | 5.39% |
|                         | after  | 1.62% | 1.91% |
| <i>Lactobacillus</i>    | before | 0.80% | 1.42% |
|                         | after  | 0.40% | 0.91% |
| <i>Parabacteroides</i>  | before | 3.96% | 3.21% |
|                         | after  | 4.09% | 3.71% |
| <i>Prevotella</i>       | before | 3.76% | 7.92% |
|                         | after  | 3.67% | 9.33% |
| <i>Roseburia</i>        | before | 2.38% | 3.34% |
|                         | after  | 1.74% | 2.06% |
| <i>Ruminococcus</i>     | before | 2.25% | 1.82% |
|                         | after  | 1.82% | 2.48% |
| <i>Subdoligranulum</i>  | before | 3.28% | 3.40% |
|                         | after  | 4.21% | 6.69% |

**Table S3 - Relative abundance genus level in volunteers**

|                     | Mean   | SD    |
|---------------------|--------|-------|
| Akkermansia         | 0.98%  | 1.99% |
| Alistipes           | 11.04% | 4.90% |
| Bacteroides         | 10.00% | 6.63% |
| Phocaeicola         | 4.02%  | 3.19% |
| Bifidobacterium     | 3.64%  | 4.12% |
| Blautia             | 1.27%  | 1.25% |
| Lachnospiraceae_u_g | 3.70%  | 2.03% |
| Firmicutes_u_g      | 4.99%  | 5.77% |
| Clostridium         | 2.58%  | 2.02% |
| Ruminococcaceae_u_g | 3.16%  | 3.38% |
| Dialister           | 1.93%  | 2.49% |
| Dorea               | 0.62%  | 0.64% |
| Escherichia         | 2.51%  | 4.47% |
| Faecalibacterium    | 7.06%  | 3.02% |
| Gemmiger            | 3.39%  | 2.73% |
| Lactobacillus       | 0.06%  | 0.13% |
| Parabacteroides     | 2.58%  | 2.27% |
| Prevotella          | 2.78%  | 4.18% |
| Roseburia           | 1.80%  | 1.64% |
| Ruminococcus        | 0.96%  | 0.98% |
| Subdoligranulum     | 5.03%  | 5.89% |

**Table S4 – Species relative abundance from controls**

|                                     | Mean  | SD    |
|-------------------------------------|-------|-------|
| <i>Escherichia coli</i>             | 2.49% | 4.44% |
| <i>Akkermansia muciniphila</i>      | 0.93% | 1.92% |
| <i>Bifidobacterium longum</i>       | 1.66% | 1.86% |
| <i>Bifidobacterium adolescentis</i> | 0.50% | 0.59% |
| <i>Subdoligranulum_u_s</i>          | 5.00% | 5.90% |
| <i>Ruminococcus_u_s</i>             | 0.47% | 0.37% |
| <i>Ruminococcaceae_u_s</i>          | 3.16% | 3.38% |
| <i>Ruminococcus bromii</i>          | 0.07% | 0.22% |
| <i>Gemmiger formicilis</i>          | 3.34% | 2.76% |
| <i>Firmicutes_u_s</i>               | 4.99% | 5.77% |
| <i>Faecalibacterium prausnitzii</i> | 4.50% | 2.21% |
| <i>Faecalibacterium_u_s</i>         | 2.55% | 1.06% |
| <i>Clostridium_u_s</i>              | 2.02% | 1.68% |
| <i>Blautia_u_s</i>                  | 1.12% | 1.20% |
| <i>Prevotella copri</i>             | 2.10% | 3.88% |
| <i>Phocaeicola vulgatus</i>         | 2.34% | 2.51% |
| <i>Phocaeicola dorei</i>            | 0.89% | 1.12% |
| <i>Parabacteroides_u_s</i>          | 0.97% | 1.00% |
| <i>Bacteroides_u_s</i>              | 3.72% | 2.50% |
| <i>Bacteroides uniformis</i>        | 3.08% | 2.52% |
| <i>Alistipes putredinis</i>         | 4.39% | 2.51% |
| <i>Alistipes shahii</i>             | 1.35% | 1.21% |
| <i>Alistipes_u_s</i>                | 1.54% | 1.31% |

**Table S5 - Species-level relative abundance before/after RAIT**

|                                     |        | Mean  | SD    |
|-------------------------------------|--------|-------|-------|
| <i>Escherichia coli</i>             | before | 1.95% | 3.95% |
|                                     | after  | 3.34% | 9.55% |
| <i>Akkermansia muciniphila</i>      | before | 1.62% | 4.33% |
|                                     | after  | 3.00% | 7.18% |
| <i>Bifidobacterium longum</i>       | before | 0.77% | 1.13% |
|                                     | after  | 0.61% | 0.98% |
| <i>Bifidobacterium adolescentis</i> | before | 2.44% | 5.17% |
|                                     | after  | 1.16% | 1.86% |
| <i>Subdoligranulum_u_s</i>          | before | 3.27% | 3.39% |
|                                     | after  | 4.21% | 6.69% |
| <i>Ruminococcus_u_s</i>             | before | 1.15% | 0.87% |
|                                     | after  | 1.04% | 1.39% |
| <i>Ruminococcaceae_u_s</i>          | before | 3.38% | 2.68% |
|                                     | after  | 3.67% | 3.46% |
| <i>Ruminococcus bromii</i>          | before | 0.80% | 0.85% |
|                                     | after  | 0.67% | 1.15% |
| <i>Gemmiger formicilis</i>          | before | 2.66% | 5.39% |
|                                     | after  | 1.61% | 1.91% |
| <i>Firmicutes_u_s</i>               | before | 4.23% | 5.22% |
|                                     | after  | 3.39% | 3.98% |
| <i>Faecalibacterium prausnitzii</i> | before | 1.70% | 1.96% |
|                                     | after  | 1.76% | 1.86% |
| <i>Faecalibacterium_u_s</i>         | before | 1.08% | 1.15% |
|                                     | after  | 1.25% | 1.50% |
| <i>Clostridium_u_s</i>              | before | 1.40% | 1.59% |
|                                     | after  | 1.42% | 2.28% |
| <i>Blautia_u_s</i>                  | before | 0.83% | 0.83% |
|                                     | after  | 0.58% | 0.64% |
| <i>Prevotella copri</i>             | before | 2.72% | 6.48% |
|                                     | after  | 2.25% | 6.54% |
| <i>Phocaeicola vulgatus</i>         | before | 2.30% | 2.38% |
|                                     | after  | 3.39% | 3.43% |
| <i>Phocaeicola dorei</i>            | before | 1.55% | 1.75% |
|                                     | after  | 1.75% | 1.75% |
| <i>Parabacteroides_u_s</i>          | before | 1.87% | 1.86% |
|                                     | after  | 1.96% | 2.23% |
| <i>Bacteroides_u_s</i>              | before | 5.15% | 4.84% |
|                                     | after  | 5.46% | 3.84% |
| <i>Bacteroides uniformis</i>        | before | 3.87% | 4.63% |
|                                     | after  | 3.74% | 3.23% |
| <i>Alistipes putredinis</i>         | before | 3.53% | 2.92% |
|                                     | after  | 3.85% | 3.44% |

|                         |        |       |       |
|-------------------------|--------|-------|-------|
| <i>Alistipes shahii</i> | before | 0.99% | 1.03% |
|                         | after  | 1.16% | 1.18% |
| <i>Alistipes_u_s</i>    | before | 1.73% | 1.47% |
|                         | after  | 1.99% | 1.64% |

**Table S6 – LefSe analysis Controls versus Thyroid cancer**

| Feature                             | Log Highest Mean  | Cohort  | Lda                | P-Value            |
|-------------------------------------|-------------------|---------|--------------------|--------------------|
| <i>Faecalibacterium prausnitzii</i> | 4.653579129618571 | Control | 4.19516870809131   | 0.000247119841581  |
| <i>Faecalibacterium_u_s</i>         | 4.406887556045944 | Control | 3.913419462969283  | 0.0013830875381884 |
| <i>Clostridiales_u_s</i>            | 4.220074400520429 | Control | 3.7090532118609154 | 0.0399084228452192 |
| <i>Ruminococcus_u_s</i>             | 4.061622015937191 | TC      | 3.507459385718969  | 0.0074205407929063 |
| <i>Ruminococcus bromii</i>          | 3.905062379064919 | TC      | 3.549936798276648  | 0.003091664128723  |
| <i>Bacteroides faecis</i>           | 3.786637689700976 | Control | 3.282148053378805  | 0.0206167465848876 |
| <i>[Clostridium] symbiosum</i>      | 3.367560952570651 | Control | 3.017963388398882  | 0.0436778750197986 |
| <i>Alistipes onderdonkii</i>        | 3.919430809994788 | TC      | 3.442509789012845  | 0.0289901213340677 |

**Table S7 –Change in absolute abundance phylum level before/after RAIT. after the Bonferroni correction**

| Phylum          | Thyroid cancer patients                       |                        |
|-----------------|-----------------------------------------------|------------------------|
|                 | Change in absolute abundance (%) <sup>a</sup> | p-value <sup>b,c</sup> |
| Actinobacteria  | -43.3 [-69.2 to 52.5]                         | 1.000                  |
| Proteobacteria  | 14.9 [-52.6 to 216.7]                         | 0.550                  |
| Bacteroidetes   | 5.2 [-35.5 to 88.7]                           | 0.960                  |
| Firmicutes      | -4.7 [-51.4 to 37.7]                          | 1.000                  |
| Verrucomicrobia | -8.6 [-87.7 to 52.2]                          | 1.000                  |

a – median [IQR]

b – Bonferroni correction

c – Wilcoxon signed ranks test

**Table S8 – Change in absolute abundance genus level before/after RAIT. p-values after the Bonferroni correction**

| Genus               | Thyroid cancer                                |                        |
|---------------------|-----------------------------------------------|------------------------|
|                     | Change in absolute abundance (%) <sup>a</sup> | p-value <sup>b,c</sup> |
| Dorea               | -28.6 [-79.7 to 69.5]                         | 1.000                  |
| Phocaeicola         | 4.2 [-46 to 99.9]                             | 1.000                  |
| Lactobacillus       | -63 [-93.8 to -6.8]                           | 0.105                  |
| Firmicutes_u_g      | -42.9 [-69.3 to 54.2]                         | 1.000                  |
| Prevotella          | 29.3 [-71.1 to 202]                           | 1.000                  |
| Ruminococcus        | -23.6 [-79.4 to 104]                          | 1.000                  |
| Clostridium         | -31.2 [-63 to 32.8]                           | 1.000                  |
| Faecalibacterium    | -19.7 [-51 to 96.5]                           | 1.000                  |
| Ruminococcaceae_u_g | -9.6 [-48.6 to 74.7]                          | 1.000                  |

|                     |                        |       |
|---------------------|------------------------|-------|
| Akkermansia         | -8.6 [-87.7 to 52.2]   | 1.000 |
| Bifidobacterium     | -52.6 [-81.3 to 7.7]   | 1.000 |
| Blautia             | -47.7 [-80.4 to 85.2]  | 1.000 |
| Subdoligranulum     | -30.3 [-65 to 65.9]    | 1.000 |
| Gemmiger            | -33.2 [-54 to 70.5]    | 1.000 |
| Roseburia           | -29.2 [-68 to 144.2]   | 1.000 |
| Escherichia         | 25.1 [-91.9 to 150.8]  | 1.000 |
| Bacteroides         | 16.3 [-28.5 to 76.1]   | 1.000 |
| Lachnospiraceae_u_g | -25.6 [-61.3 to 110.3] | 1.000 |
| Dialister           | -26.7 [-92.3 to 11.1]  | 1.000 |
| Alistipes           | -11.6 [-51.2 to 127.7] | 1.000 |
| Parabacteroides     | -7.5 [-46.1 to 98.4]   | 1.000 |

**Table S9** – Change in absolute abundance species-level before/after RAIT. p-values after the Bonferroni correction

| Species                      | Thyroid cancer                                |                        |
|------------------------------|-----------------------------------------------|------------------------|
|                              | Change in absolute abundance (%) <sup>a</sup> | p-value <sup>b,c</sup> |
| Blautia_u_s                  | -48.3 [-81.9 to 38.6]                         | 1.000                  |
| Ruminococcus_u_s             | -23.7 [-70.3 to 183.1]                        | 1.000                  |
| Ruminococcus.bromii          | -67 [-97.1 to -5.4]                           | 0.322                  |
| Firmicutes_u_s               | -42.9 [-69.3 to 54.2]                         | 1.000                  |
| Alistipes.putredinis         | 2.1 [-41.8 to 133.8]                          | 1.000                  |
| Parabacteroides_u_s          | -15.7 [-62.7 to 87.6]                         | 1.000                  |
| Bacteroides.uniformis        | 1.5 [-59.7 to 68.1]                           | 1.000                  |
| Phocaeicola.vulgatus         | -8.3 [-42.5 to 108.7]                         | 1.000                  |
| Akkermansia.muciniphila      | -8.2 [-99.6 to 64]                            | 1.000                  |
| Alistipes.shahii             | 3.2 [-41.3 to 53.1]                           | 1.000                  |
| Escherichia.coli             | 41.5 [-86.4 to 297.8]                         | 1.000                  |
| Faecalibacterium_u_s         | -22.9 [-49.8 to 59]                           | 1.000                  |
| Phocaeicola.dorei            | -2.6 [-46.4 to 73.1]                          | 1.000                  |
| Bifidobacterium.longum       | -63.4 [-92.8 to -9.5]                         | 0.345                  |
| Faecalibacterium.prausnitzii | -20.8 [-46.9 to 131.5]                        | 1.000                  |
| Subdoligranulum_u_s          | -30.3 [-64.9 to 65.7]                         | 1.000                  |
| Alistipes_u_s                | -6.5 [-44.1 to 119.4]                         | 1.000                  |
| Clostridium_u_s              | -39.9 [-76.8 to 76.9]                         | 1.000                  |
| Ruminococcaceae_u_s          | -9.6 [-48.6 to 74.7]                          | 1.000                  |
| Prevotella.copri             | -58.3 [-88.6 to 46.4]                         | 1.000                  |
| Gemmiger.formicilis          | -33.2 [-63.9 to 70.5]                         | 1.000                  |
| Bifidobacterium.adolescentis | -66.6 [-88.7 to -18.8]                        | 1.000                  |
| Bacteroides_u_s              | -0.9 [-48.8 to 82.2]                          | 1.000                  |

**Table S10** – Change in relative abundance phylum level before/after RAIT. p-values after the Bonferroni correction

| Phylum | Thyroid cancer                                       |                        |
|--------|------------------------------------------------------|------------------------|
|        | Change in <b>relative</b> abundance (%) <sup>a</sup> | p-value <sup>b,c</sup> |

|                 |                       |       |
|-----------------|-----------------------|-------|
| Actinobacteria  | -28.2 [-67.6 to 34.5] | 1.000 |
| Proteobacteria  | -0.2 [-42 to 158.2]   | 0.810 |
| Bacteroidetes   | 5.7 [-16.9 to 49]     | 1.000 |
| Firmicutes      | -10.2 [-28.8 to 23.8] | 1.000 |
| Verrucomicrobia | 2.3 [-92.3 to 94.3]   | 1.000 |

a – median [IQR]

b – Bonferroni correction

c – Wilcoxon signed ranks test

**Table S11** – Change in relative abundance genus-level before/after RAIT. p-values after the Bonferroni correction

| Genus               | Thyroid cancer                                       |                        |
|---------------------|------------------------------------------------------|------------------------|
|                     | Change in <b>relative</b> abundance (%) <sup>a</sup> | p-value <sup>b,c</sup> |
| Dorea               | -25.7 [-76 to 94.9]                                  | 1.000                  |
| Phocaeicola         | 40.2 [-34.6 to 89]                                   | 0.966                  |
| Lactobacillus       | -67.9 [-93.3 to 4.3]                                 | 0.231                  |
| Firmicutes_u_g      | -41.5 [-71.7 to 70.5]                                | 1.000                  |
| Prevotella          | -25.8 [-60.7 to 167.1]                               | 1.000                  |
| Ruminococcus        | -31.9 [-70.2 to 68.4]                                | 1.000                  |
| Clostridium         | -24.7 [-61.2 to 37.5]                                | 1.000                  |
| Faecalibacterium    | 4.6 [-41 to 52.7]                                    | 1.000                  |
| Ruminococcaceae_u_g | -9.1 [-36.3 to 44.6]                                 | 1.000                  |
| Akkermansia         | 2.8 [-89.1 to 94.3]                                  | 1.000                  |
| Bifidobacterium     | -40.3 [-80 to 29.9]                                  | 1.000                  |
| Blautia             | -49 [-73.9 to 44.3]                                  | 1.000                  |
| Subdoligranulum     | -14.3 [-47.2 to 58.2]                                | 1.000                  |
| Gemmiger            | -17.6 [-56.9 to 62.1]                                | 1.000                  |
| Roseburia           | -17.7 [-63.3 to 66.8]                                | 1.000                  |
| Escherichia         | -11.9 [-92.3 to 198.7]                               | 1.000                  |
| Bacteroides         | 15.4 [-28.4 to 63.7]                                 | 1.000                  |
| Lachnospiraceae_u_g | 8.4 [-61.9 to 85.3]                                  | 1.000                  |
| Dialister           | -30 [-98.2 to 8.3]                                   | 1.000                  |
| Alistipes           | -6.1 [-38.2 to 93.4]                                 | 1.000                  |
| Parabacteroides     | -1.6 [-42.4 to 79.5]                                 | 1.000                  |

**Table S12** – Change in relative abundance species-level before/after RAIT. p-value after the Bonferroni correction

| Species              | Thyroid cancer                                       |                        |
|----------------------|------------------------------------------------------|------------------------|
|                      | Change in <b>absolute</b> abundance (%) <sup>a</sup> | p-value <sup>b,c</sup> |
| Blautia_u_s          | -32.3 [-76.3 to 39]                                  | 1.000                  |
| Ruminococcus_u_s     | -27.3 [-70 to 66.7]                                  | 1.000                  |
| Ruminococcus.bromii  | -66.3 [-92.7 to 17.1]                                | 0.966                  |
| Firmicutes_u_s       | -41.5 [-71.7 to 70.5]                                | 1.000                  |
| Alistipes.putredinis | 1.4 [-32.5 to 108.9]                                 | 1.000                  |

|                              |                        |       |
|------------------------------|------------------------|-------|
| Parabacteroides_u_s          | -13.5 [-52.9 to 89.4]  | 1.000 |
| Bacteroides.uniformis        | -18.3 [-46.3 to 66.2]  | 1.000 |
| Phocaeicola.vulgatus         | 29.9 [-31.3 to 93.5]   | 1.000 |
| Akkermansia.muciniphila      | 3 [-99.5 to 116.1]     | 1.000 |
| Alistipes.shahii             | 6.6 [-16.6 to 40.6]    | 1.000 |
| Escherichia.coli             | -14.9 [-87.1 to 323.1] | 1.000 |
| Faecalibacterium_u_s         | 4 [-32.9 to 67.3]      | 1.000 |
| Phocaeicola.dorei            | 21.3 [-47.6 to 53.2]   | 1.000 |
| Bifidobacterium.longum       | -52.7 [-86.4 to 15.9]  | 1.000 |
| Faecalibacterium.prausnitzii | 7.5 [-31.9 to 75.3]    | 1.000 |
| Subdoligranulum_u_s          | -13.9 [-47.1 to 58]    | 1.000 |
| Alistipes_u_s                | 2 [-27.5 to 106.2]     | 1.000 |
| Clostridium_u_s              | -10.1 [-75 to 48.4]    | 1.000 |
| Ruminococcaceae_u_s          | -9.1 [-36.3 to 44.6]   | 1.000 |
| Prevotella.copri             | -49 [-88.5 to 1.6]     | 1.000 |
| Gemmiger.formicilis          | -17.6 [-66.2 to 62.1]  | 1.000 |
| Bifidobacterium.adolescentis | -43.5 [-83.4 to 21]    | 1.000 |
| Bacteroides_u_s              | 12 [-33.6 to 61.9]     | 1.000 |
